# Supplementary material for: RNAPII-dependent ATM signaling at collisions with replication forks
Source: PubMed Central journal article supplement (PMC10449895; doi:10.1038/s41467-023-40924-4), 2023-08-24
Supplement: 41467_2023_40924_MOESM3_ESM.pdf [file 41467_2023_40924_MOESM3_ESM.pdf]

## **Description of Additional Supplementary Files Document**

File Name: Supplementary Data 1

Description: List of commercial reagents. This file contains a list of catalog numbers and company names of commercial reagents used throughout this study
